# Supplementary material for: Negative space charge modulated ion transport through PEDOT:PSS hydrogels integrating nanofluidic channels for highly efficient osmotic energy harvesting
Source: Royal Society of Chemistry journal article supplement (doi:10.1039/d4ta00073k), 2024-01-01
Supplement: d4ta00073k1.pdf [file d4ta00073k1.pdf]

## Supporting information

### 1 **Negative Space Charge Modulated Ion Transport through** 2 **PEDOT: PSS Hydrogel Integrating Nanofluidic Channels for** 3 **High-Efficient Osmotic Energy Harvesting**

4 Rui Zhu,<sup>a</sup> Peng Sun,<sup>d</sup> Guofeng Cui,<sup>a\*</sup> Yaoguang Yu,<sup>b\*</sup> Shaojun Ke,<sup>c</sup> Jie Zhao,<sup>c</sup>

5 <sup>a</sup>.Key Laboratory for Polymeric Composite & Functional Materials of Ministry of Education, Key Laboratory of Low-carbon Chemistry &  
6 Energy Conservation of Guangdong Province, School of Chemistry, Sun Yat-sen University, Guangzhou 510275, P. R. China. E-mails:  
7 [cuiyf@mail.sysu.edu.cn](mailto:cuiyf@mail.sysu.edu.cn).

8 <sup>b</sup>.School of Materials, Sun Yat-sen University, Shenzhen 518107, P. R. China. E-mails: [yuyg5@mail.sysu.edu.cn](mailto:yuyg5@mail.sysu.edu.cn).

9 <sup>c</sup>.School of Mechanical and Automotive Engineering, South China University of Technology, Guangzhou 510640, P. R. China.

10 <sup>d</sup>.Guangdong Provincial Engineering Technology Research Center of Vacuum Coating Technologies and New Energy Materials, Siyuan  
11 Laboratory, Guangzhou Key Laboratory of Vacuum Coating Technologies and New Energy Materials, Department of Physics, Jinan  
12 University, Guangzhou, Guangdong 510632, People's Republic of China.

## Supporting information

### 14 **Experimental Methods**

15 To further verify the effect of the thickness and composition (PEDOT: PSS) of the hydrogel  
16 membrane on the acquisition of osmotic energy, different single-factor experiments were executed  
17 separately. Firstly, hydrogel membranes of 100  $\mu\text{m}$ , 200  $\mu\text{m}$ , 300  $\mu\text{m}$ , 400  $\mu\text{m}$ , 500  $\mu\text{m}$ , and 600  
18  $\mu\text{m}$  sizes were prepared and assembled into the osmotic energy acquisition device to verify the effect  
19 of membrane thickness on osmotic energy performance with the concentration gradient of artificial  
20 seawater and river water, respectively. Then, the thickness of the membrane was fixed at 236  $\mu\text{m}$ ,  
21 and the effect of PEDOT: PSS addition on the output power was verified by controlling the amount  
22 of PEDOT: PSS added (1%, 3%, 5%, 7%, 10%, 15%, 20%, and 25%) with the concentration  
23 gradient of artificial seawater and river water.

24

## Supporting information

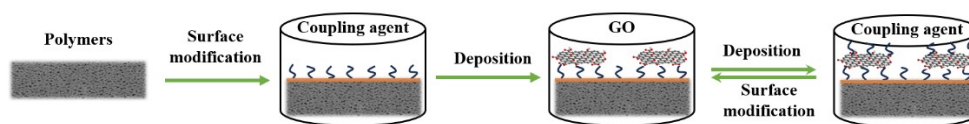

25

26 **Fig. S1** Schematic of synthesis of conventional permeable membrane. The preparation of permeable

27 membranes by composite/ modified polymers with 2D materials was previously considered a viable

28 option, but the complicated process and lower stability posed significant challenges to its advancement.

29

## Supporting information

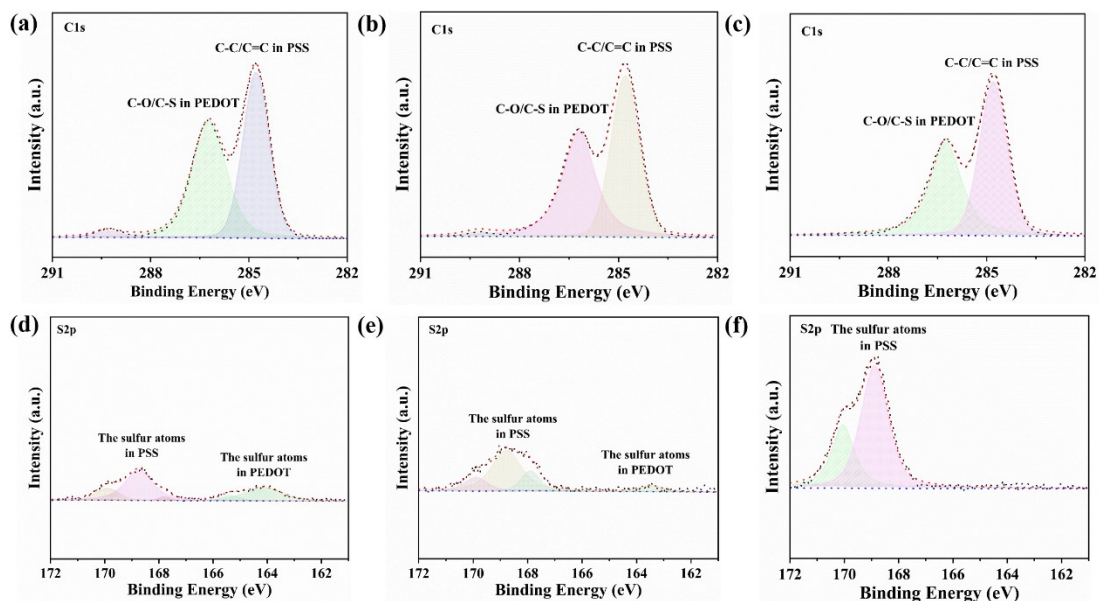

30

31 **Fig. S2** (a)-(c) C1s XPS spectra and (d)-(f) S2p XPS spectra of PEDOT: PSS hydrogel.

32 As depicted in Fig. 1(b), the shift of the  $C\alpha=C\beta$  bond in PEDOT to lower  
 33 wavelengths, the slight shift of the C-S-C bond ( $579\text{ cm}^{-1}$ ) to shorter wavelengths,  
 34 coupled with its significant enhancement upon  $H_2SO_4$  doping, which these indicate the  
 35 increase of quinone structure in the main chain of PEDOT. As shown in Fig. S2(a)-(c),  
 36 the peak at 284 eV corresponds to the C-C/C=C bond in PSS, while the peak at 286 eV  
 37 corresponds to the C-O/C-S bond in PEDOT. Obviously, the increased ratio of C-  
 38 C/C=C to C-O/C-S indicates that more sulfonates in the PSS chain segments form  
 39 hydrogen bonds with PVA or PA. Meanwhile, in the S(2p) XPS spectra (Fig. S2(d)-  
 40 (f)), the peaks at 166-172 eV and 161-166 eV were attributed to the sulfur atoms in PSS  
 41 and PEDOT, respectively. The proportion of sulfur elements in PSS and PEDOT  
 42 gradually increases with further doping cross-linking, which was attributed to the  
 43 substitution of partial PSS by PA during the cross-linking process and the doping of  
 44  $H_2SO_4$ .

45

## Supporting information

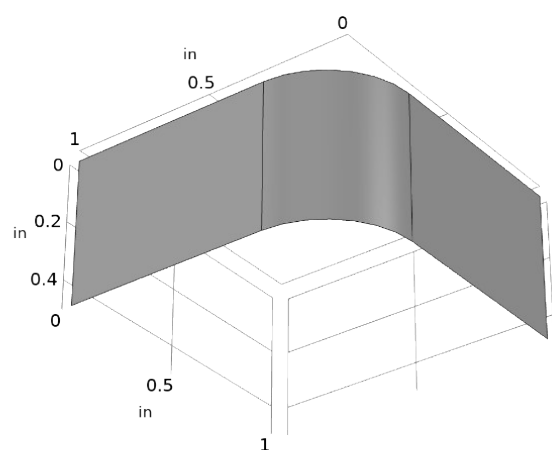

46

47 **Fig. S3** Bending strain analysis model.

48

## Supporting information

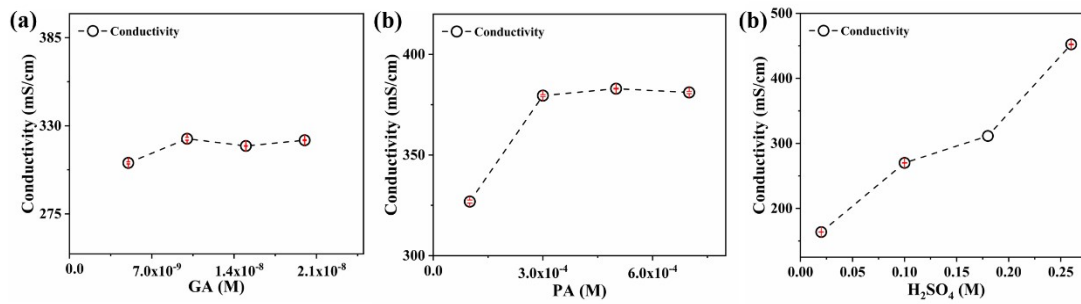

49

50 **Fig. S4** Conductivity test results of PEDOT: PSS hydrogels adding different amounts of (a) GA, (b) PA

51 and (c)  $H_2SO_4$ , respectively.

52

## Supporting information

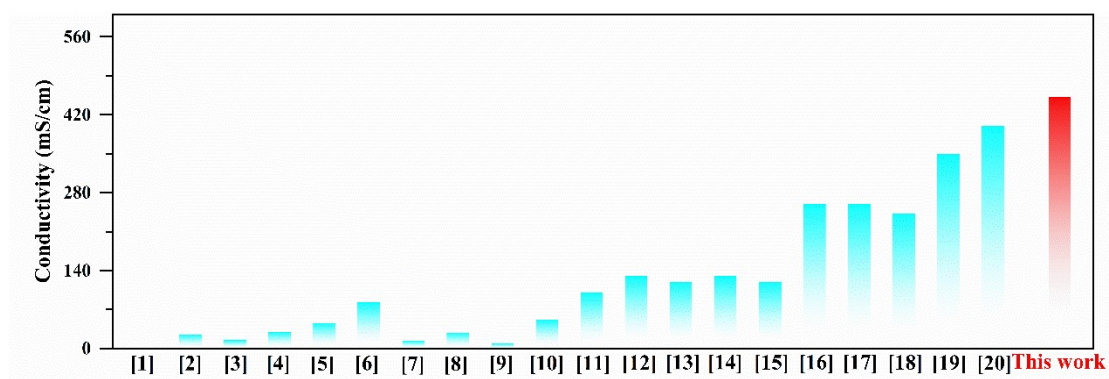

53

54 **Fig. S5** Comparison of conductivity with the reported composite conductive hydrogels. <sup>1-20</sup>

55

## Supporting information

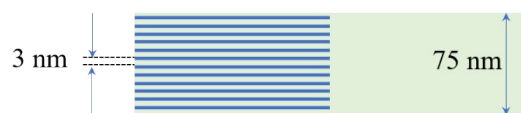

56

57 **Fig. S6** Nano-channel computational modeling.

58

## Supporting information

### 59 MEASUREMENT OF OSMOTIC ENERGY CONVERSION

60 As shown in Fig. 4(f), the whole circuit diagram consists of three parts: the electrode,  
61 membrane, and external circuit. Among them, the membrane includes membrane  
62 resistance  $r_{int}$  and transmembrane diffusion potential.  $r_{int}$  denotes the ion transport  
63 resistance in the ion-selective membrane.  $E_{diff}$  is generated by the concentration  
64 gradient on both sides of the membrane, which can be calculated by the following  
65 equation:

$$66 \quad E_{diff} = (2t_+ - 1) \frac{RT}{zF} \ln \left( \frac{\gamma_H C_H}{\gamma_L C_L} \right)$$

67 where  $R$  is the universal gas constant,  $T$  is the Kelvin temperature,  $z$  is the ion valence  
68 state, and  $F$  is the Faraday constant.  $C_H$  and  $C_L$  are the ion concentrations at high  
69 concentrations and low concentrations, respectively.  $\gamma_H$  and  $\gamma_L$  are the ion activity  
70 coefficients of the high-concentration solution and low-concentration solution,  
71 respectively.

72 The measured  $V_{OC}$  is the sum of  $E_{diff}$  and  $E_{redox}$  as in the following formula:

$$73 \quad V_{oc} = E_{diff} + E_{redox}$$

74 The electrodes can be abstracted as the redox potential  $E_{redox}$ , which is derived from  
75 the electrode potential drop when the two electrodes enter solutions of different  
76 concentrations. The  $E_{redox}$  can be calculated by the following equation:

$$77 \quad E_{redox} = \frac{RT}{zF} \ln \left( \frac{\gamma_H C_H}{\gamma_L C_L} \right)$$

78 The external circuit consists of an external load  $r_L$  and an ammeter used to measure  
79 the current in the circuit.

## Supporting information

80

## Supporting information

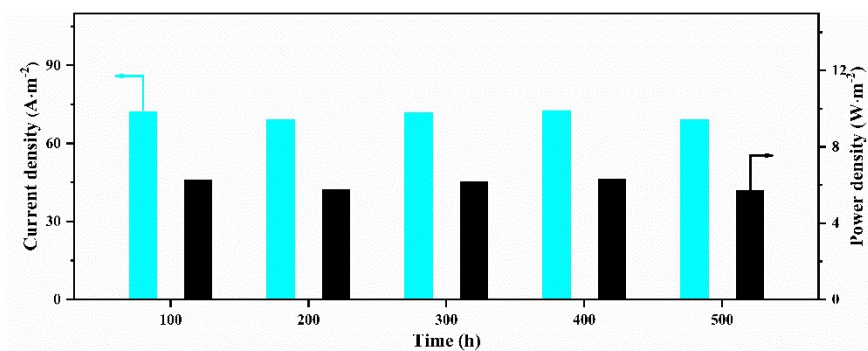

81

82 **Fig. S7** The device stability of power generation.

83

## Supporting information

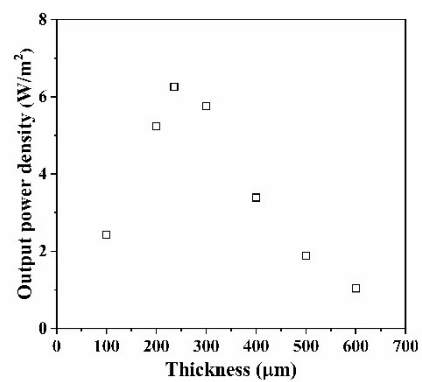

84

85 **Fig. S8** The influence of the hydrogel membrane thickness in osmotic energy performance.

86

## Supporting information

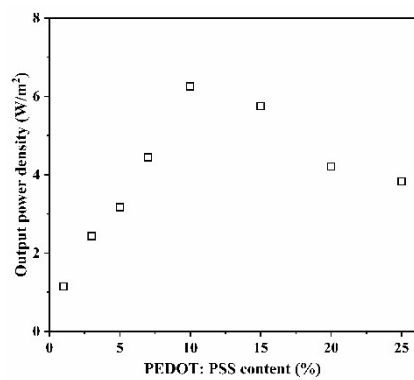

87

88 **Fig. S9** The influence of PEDOT: PSS addition in osmotic energy performance.

89

## Supporting information

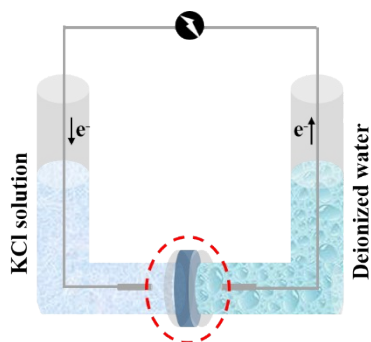

90

91 **Fig. S10** Schematic representation of the ICEG setup.

92 **Table S1** Electrochemical parameters of a single unit of the ICEG.

|                   | $V_0$ (mV) | $V_{theo}$ (mV) | Permselectivity (%) | Conversion efficiency (%) |
|-------------------|------------|-----------------|---------------------|---------------------------|
| Configuration (I) | 396        | 414             | 95.6                | 45.8                      |

93 The parameters of a single unit of the PEDOT: PSS membrane pair were measured  
 94 in an ICEG device (Fig. S10). Ag/AgCl was used as the cathode and anode. The high  
 95 concentration (HC) and low concentration (LC) of the salt solutions were 3.0 M and  
 96 0.3  $\mu$ M, respectively. The membrane permselectivity ( $\alpha$ ) could be calculated as the  
 97 ratio between the measured membrane potential ( $V_{meas}$ ) and the theoretical membrane  
 98 potential ( $V_{theo}$ ):<sup>21, 22</sup>

99 
$$\alpha(\%) = \frac{V_{meas}}{V_{theo}} \times 100$$

100 
$$V_{theo} = N \frac{RT}{zF} \ln \left( \frac{a_H}{a_L} \right)$$

101 where  $N$  is the number of membranes,  $\alpha$  is the average membrane permselectivity of  
 102 an anion and a cation exchange membrane,  $R$  is the universal gas constant (8.314 J·mol<sup>-1</sup>·K<sup>-1</sup>),  
 103  $T$  is the absolute temperature (K),  $z$  is the electrochemical valence,  $F$  is the

## Supporting information

104 Faraday constant ( $96485 \text{ C}\cdot\text{mol}^{-1}$ ),  $a_H$  is the activity of the concentrated solution  
105 ( $\text{mol}\cdot\text{L}^{-1}$ ), and  $a_L$  is the activity of the diluted solution ( $\text{mol}\cdot\text{L}^{-1}$ ). For seawater (3.0 M  
106 KCl) and river water (0.3  $\mu\text{M}$  KCl) the theoretical voltage difference over each  
107 membrane for 100% selective membranes is 414 mV.

108 The electrochemical conversion efficiency ( $\eta$ ) can be calculated by the following  
109 formula: <sup>23, 24</sup>

$$\eta_{max} = \frac{\alpha^2}{2}$$

111

## Supporting information

112 **Table S2** Comparison of osmotic energy conversion performance.

| Material                   | Solution                               | Testing<br>area<br>(mm <sup>2</sup> ) | Energy conversion<br>performance | Ref. |
|----------------------------|----------------------------------------|---------------------------------------|----------------------------------|------|
| PET membrane               | Artificial seawater<br>and river water | 0.03                                  | 0.86 W/m <sup>2</sup>            | [54] |
| PAM hydrogel<br>membrane   | Artificial seawater<br>and river water | 28                                    | 0.37 W/m <sup>2</sup>            | [55] |
| SPEEK<br>membranes         | Artificial seawater<br>and river water | 28                                    | 5.8W/m <sup>2</sup>              | [56] |
| HEMAp hydrogel<br>membrane | Artificial seawater<br>and river water | 0.03                                  | 5.38 W/m <sup>2</sup>            | [57] |
| Loofah sponge<br>membranes | Artificial seawater<br>and river water | 60                                    | 0.0183 W/m <sup>2</sup>          | [58] |
| MMT<br>membranes           | Artificial seawater<br>and river water | 0.03                                  | 2.1 W/m <sup>2</sup>             | [59] |
| KANF<br>membranes          | Artificial seawater<br>and river water | 0.03                                  | 4.8 W/m <sup>2</sup>             | [60] |
| GOMs membrane              | Artificial seawater<br>and river water | 0.03                                  | 4.94 W/m <sup>2</sup>            | [61] |
| PPC membrane               | Artificial seawater<br>and river water | 0.075                                 | 2.2 W/m <sup>2</sup>             | [62] |

## Supporting information

|                                |                                                |             |                             |                      |
|--------------------------------|------------------------------------------------|-------------|-----------------------------|----------------------|
| FOF membrane                   | 0.5M/1mM NaCl<br>solution                      | 0.02        | 5.7 W/m <sup>2</sup>        | [63]                 |
| Glass membrane                 | Artificial seawater<br>and river water         | 0.03        | 4.16 W/m <sup>2</sup>       | [64]                 |
| MMT membranes                  | Artificial seawater<br>and river water         | 0.03        | 4.13 W/m <sup>2</sup>       | [65]                 |
| <b>PEDOT: PSS<br/>hydrogel</b> | <b>Artificial seawater<br/>and river water</b> | <b>38.5</b> | <b>6.26 W/m<sup>2</sup></b> | <b>This<br/>work</b> |

113 Note: Composition of simulated seawater (NaCl: 0.454M; MgSO<sub>4</sub>: 0.028M; MgCl<sub>2</sub>: 0.0257M; CaCl<sub>2</sub>:

114 0.0103M; KCl: 0.00972M; NaHCO<sub>3</sub>: 0.00241M) and river water (NaCl: 0.01M).

115

## Supporting information

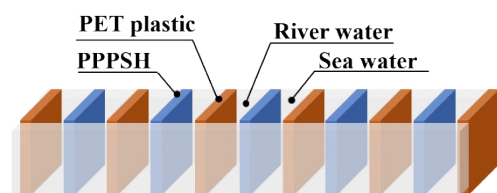

**Ion Concentration-induced Electricity Generator**

116

117 **Fig. S11** Electrochemical cell series device.

118

## Supporting information

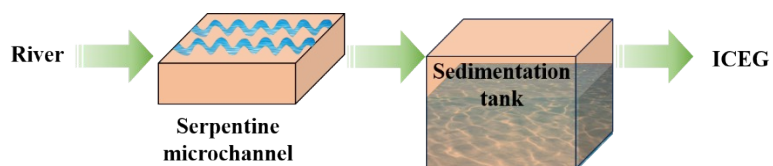

119

120 **Fig. S12** River water pre-treatment unit. In practical application, flowing river water flows into the series-

121 connected ICEG devices through serpentine microchannels and settling tanks, which can effectively

122 buffer the current impact and reduce impurities.

123

## Supporting information

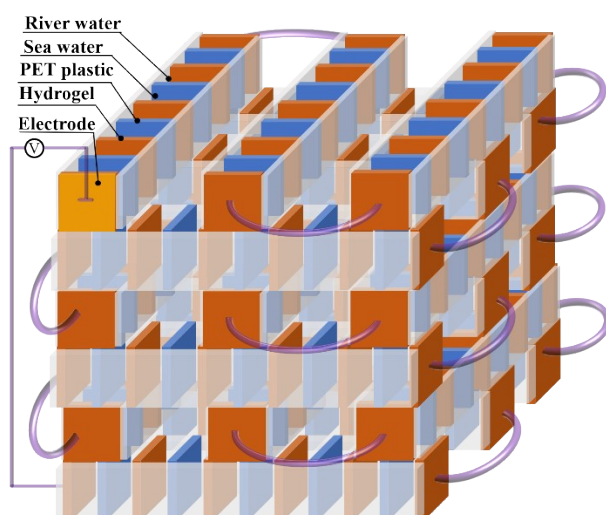

124

125 **Fig. S13** Schematic diagram of ICEG devices.

126

## Supporting information

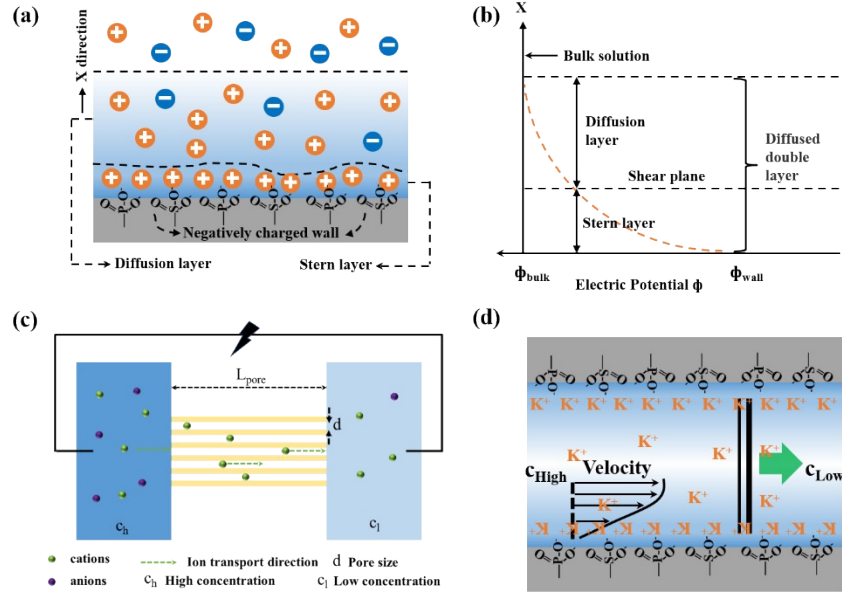

127

128 **Fig. S14** (a) Schematic diagram of the electrical double layer mechanism (EDL) next to a negatively  
 129 charged wall. (b) Diffusion-osmotic current induced by salt concentration difference. (c) Sketch of the  
 130 nanofluidic osmotic energy conversion model. (d) Electrical distribution from charged wall to bulk  
 131 solution.

132

133 We built a two-dimensional model to illustrate the osmotic energy conversion process, as shown in  
 134 Fig. S14c. The model consists of a high concentration of seawater, a low concentration of river water  
 135 and a hydrogel nanochannel membrane. In the negatively charged nano-channels, the electrostatic force  
 136 repels ions with the same charge (co-ions, negatively charged  $\text{Cl}^-$  ions in our work) near the channel  
 137 surface and attracts ions with the opposite charge (counter-ions, positively charge  $\text{K}^+$  ions in our work)  
 138 to compensate the fixed charges (in our study negatively charges introduced by sulphuric or phosphoric  
 139 acid groups) on the surface, thus leading to a charge redistribution.<sup>25</sup> However, only a fraction of counter-  
 140 ions ends up at the charged wall. A graded electric double-layer (abbreviated as EDL) is created between  
 141 the nano-channel wall and the electrolyte solution, with an increased concentration of counter-ions and  
 142 a decreased concentration of co-ions (Fig. S14a). The EDL refers to the Stern and diffusion layers.<sup>26-28</sup>

## Supporting information

143 The Stern layer is comprised entirely of counter-ions due to contact interactions. The diffusion layer is  
144 the region from the Stern layer to the bulk solution, where the distribution of free ions is still governed  
145 by the Coulomb force, electrically screened by the Stern layer. As depicted in Fig. S14b, the interaction  
146 between counterions in the nano-channel and the charge of its inner wall is usually simplified by an  
147 exponentially decaying potential.<sup>29</sup> Through this interaction, by which way the channel is filled with a  
148 close to unipolar solution of counter-ions, and ion selectivity of transport can be observed. Based on the  
149 ion-selectivity mechanism, a streaming current is generated when the ionic solution is propelled by an  
150 external mechanical driving force (a transmembrane concentration difference) through charged  
151 nanofluidic channels (Fig. S14d).<sup>30-34</sup> In this way, the net charge (counter-ions,  $K^+$  in our work) within  
152 the diffused double layer moves at a certain velocity under the effect of a concentration gradient. At this  
153 point, counter-ions ( $K^+$  ions in this work) spontaneously and preferentially diffuse along the diffused  
154 double layer within the nano-channels. Ideally, the transport of counter-ions is proportional to the charge  
155 density on the surface of the nano-channel. Conductance measurements reveal the charge-control ion  
156 transportation within the PEDOT: PSS hydrogel membrane, as shown in Fig. 3(c), where the measured  
157 ionic conductance exhibited two distinct characteristic behaviors.<sup>35</sup> Specifically, above the 0.5M  
158 concentration point, the ionic conductance of the membrane follows the bulk rule of linearly increasing  
159 with concentration. However, the conductance deviates from the bulk value and gradually approached  
160 smoothing at concentrations less than 0.5M. In the low concentration region, the selective transport of  
161 ions tends to be controlled by the double electric layer within the nano-channel, as depicted in Fig. S14d.  
162 Because of the negatively charged surface in the channel (the intrinsic negative charge of the nano-  
163 channel inner wall is introduced by sulfate or phosphate groups during the synthesis of the hydrogel),  $K^+$

## Supporting information

164 ions with opposite charges will be separated from identically charged  $\text{Cl}^-$  ions in the channel, creating a

165 unipolar environment.

166

## Supporting information

167 **Table S3** Price Comparison of Permeable Membranes.

| Membrane                                              | Component                                              | Functional Group       | Size for single sheet      | Price                 |
|-------------------------------------------------------|--------------------------------------------------------|------------------------|----------------------------|-----------------------|
| AMI-7001S<br>anion exchange<br>membrane <sup>a</sup>  | Gel polystyrene<br>cross linked with<br>divinylbenzene | Quaternary<br>Ammonium | 1.2 m × 1.0 m ×<br>0.45 mm | \$350<br>per<br>sheet |
| CMI-7000S<br>cation exchange<br>membrane <sup>a</sup> | Gel polystyrene<br>cross linked with<br>divinylbenzene | Sulphonic<br>Acid      | 1.2 m × 1.0 m ×<br>0.45 mm | \$350<br>per<br>sheet |
| PEDOT: PSS<br>membrane                                | PEDOT: PSS<br>hydrogel                                 | Phytic Acid<br>PSS     | 1.2 m × 1.0 m ×<br>1.0 mm  | \$10 per<br>sheet     |

168 <sup>a</sup> The commercial ion exchange membranes were provided by Membrane International Inc.

169

## Supporting information

### 170 **References**

- 171 1. W. H. Shi, Z. W. Wang, H. Song, Y. Z. Chang, W. J. Hou, Y. P. Li, G. Y. Han, *ACS*  
172 *Appl. Mater. Interfaces*, 2022, **14**, 35114-35125.
- 173 2. S. T. Wang, G. Q. Guo, X. X. Lu, S. M. Ji, G. X. Tan, L. Gao, *ACS Appl. Mater.*  
174 *Interfaces*, 2018, **10**, 19133-19142.
- 175 3. S. M. Zhang, Y. H. Chen, H. Liu, Z. T. Wang, H. N. Ling, A. Khademhosseini,  
176 *Adv. Mater.* 2020, **32**, 1904752.
- 177 4. Y. Xu, P. A. Patsis, S. Hauser, J. Pietzsch, Y. X. Zhang, *Adv. Sci.* 2019, **6**, 1802077.
- 178 5. L. V. Kayser, M. D. Russell, D. Rodriguez, S. N. Abuhamdieh, D. J. Lipomi, *Chem.*  
179 *Mater.* 2018, **30**, 4459-4468.
- 180 6. J. N. Arthur, S. Burns, C. M. Cole, Q. T. Barthelme, S. D. Yambem, *J. Mater.*  
181 *Chem. C* 2022, **10**, 13964.
- 182 7. N. M. Badawi, M. Bhatia, S. Ramesh, K. Ramesh, B. Shaik, S. F. Adil, *Polymers*  
183 2023, **15**, 571.
- 184 8. Q. Wu, J. J. Wei, B. Xu, X. H. Liu, H. B. Wang, W. Wang, Q. G. Wang, W. G. Liu,  
185 *Scientific Reports* 2017, **7**, 41566.
- 186 9. B. Y. Lu, H. Yuk, S. T. Lin, N. N. Jian, K. Qu, J. K. Xu, X. H. Zhao, *NATURE*  
187 *COMMUNICATIONS* 2019, **10**, 1043.
- 188 10. K. Ren, Y. Cheng, C. Huang, R. Chen, Z. Wang, J. Wei, *J. Mater. Chem. B* 2019,  
189 **7**, 5704.
- 190 11. J. S. Chen, J. F. Liu, T. Thundat, H. B. Zeng, *ACS Appl. Mater. Interfaces* 2019,  
191 **11**, 18720-18729.
- 192 12. J. Q. Han, Q. Q. Ding, C. T. Mei, Q. L. Wu, Y. Y. Yue, X. W. Xu, *Electrochimica*  
193 *Acta* 2019, **318**, 660-672.
- 194 13. T. Wang, Y. Zhang, Q. C. Liu, W. Cheng, X. R. Wang, L. J. Pan, H. X. Xu, *Adv.*  
195 *Funct. Mater.* 2018, **28**, 1705551.
- 196 14. J. S. Chen, Q. Y. Peng, T. Thundat, H. B. Zeng, *Chem. Mater.* 2019, **31**, 4553-  
197 4563.
- 198 15. Y. Shi, M. Wang, C. B. Ma, Y. Q. Wang, X. P. Li, G. H. Yu, *Nano Lett.* 2015, **15**,

## Supporting information

- 199 6276-6281.
- 200 16. M. Kotal, S. K. Srivastava, B. Paramanik, *J. Phys. Chem. C* 2011, **115**, 1496-1505.
- 201 17. Z. X. Deng, Y. Guo, X. Zhao, P. X. Ma, B. L. Guo, *Chem. Mater.* 2018, **30**, 1729-
- 202 1742.
- 203 18. C. Qian, T. Higashigaki, T. Asoh, H. Uyama, *ACS Appl. Mater. Interfaces* 2020,
- 204 **12**, 27518-27525.
- 205 19. J. S. Chen, Q. Y. Peng, T. Thundat, H. B. Zeng, *Chem. Mater.* 2019, **31**, 4553-
- 206 4563.
- 207 20. F. F. Fu, J. L. Wang, H. B. Zeng, J. Yu, *ACS Materials Lett.* 2020, **2**, 1287-1301.
- 208 21. E. Guler, R. Elizen, D. A. Vermaas, *J. Membr. Sci.* 2013, **446**, 266-276.
- 209 22. P. Dlugolecki, A. Gambier, K. Nymeijer, *Environ. Sci. Technol.* 2009, **43**, 6888-
- 210 6894.
- 211 23. J. Ji, Q. Kang, Y. Zhou, *Adv. Funct. Mater.* 2017, **27**, 1603623.
- 212 24. D. K. Kim, C. H. Duan, Y. F. Chen, *Microfluid. Nanofluid.* 2010, **9**, 1215-1224.
- 213 25. A. S. Dukhin, P. J. Goetz, *Studies in Interface Science*, 2010, **24**, 21-89.
- 214 26. D.C. Grahame, *Chem. Rev.*, 1947, **41**, 441-501.
- 215 27. P. Delahay, *John Wiley & Sons Inc*, 1965.
- 216 28. M. A. Brown, A. Goel, Z. Abbas, *Angew. Chem. Int. Ed.*, 2016, **55**, 3790-3794.
- 217 29. W. Sparreboom, A. van den Berg, J. C. Eijkel, *Nat. Nanotechnol.*, 2009, **4**, 713-
- 218 720.
- 219 30. F. H. Van der Heyden, D. Stein, C. Dekker, *Phys. Rev. Lett.*, 2005, **95**, 116104.
- 220 31. F. H. J. Van der Heyden, D. J. Bonthuis, D. Stein, C. Meyer, C. Dekker, *Nano*
- 221 *Lett.*, 2006, **6**, 2232-2237.
- 222 32. W. Guo, L. Cao, J. Xia, F. Q. Nie, W. Ma, J. Xue, Y. Song, D. Zhu, Y. Wang, L.
- 223 Jiang, *Adv. Funct. Mater.*, 2010, **20**, 1339-1344.
- 224 33. C. L. Rice, R. Whitehead, *J. Phys. Chem.*, 1965, **69**, 4017-4024.
- 225 34. H. Daiguji, P. Yang, A. J. Szeri, A. Majumdar, *Nano Lett.*, 2004, **4**, 2315-2321.
- 226 35. W. W. Xin, Z. Zhang, X. Y. Kong, L. Jiang, L. P. Wen, *Nature Communications*,
- 227 2019, **10**, 3876.
